# Supplementary material for: Engineering diketopyrrolopyrrole sensitizers for highly efficient dye-sensitized solar cells: enhanced light harvesting and intramolecular charge transfer
Source: Royal Society of Chemistry journal article supplement (doi:10.1039/c4ra02009j), 2014-01-01
Supplement: c4ra02009j1.pdf [file c4ra02009j1.pdf]

Supporting information for  
Engineering Diketopyrrolopyrrole Sensitizers for Highly  
Efficient Dye-Sensitized Solar Cells: Enhanced Light  
Harvesting and Intramolecular Charge Transfer

Jin-Hua Huang,<sup>a,b</sup> Ke-Jian Jiang,<sup>a,b,\*</sup> Fang Zhang,<sup>a,b</sup> Wei Wu,<sup>a,b</sup> Shao-Gang Li,<sup>a,b</sup> Lian-Ming  
Yang,<sup>a,b</sup> and Yan-Lin Song<sup>a,b,\*</sup>

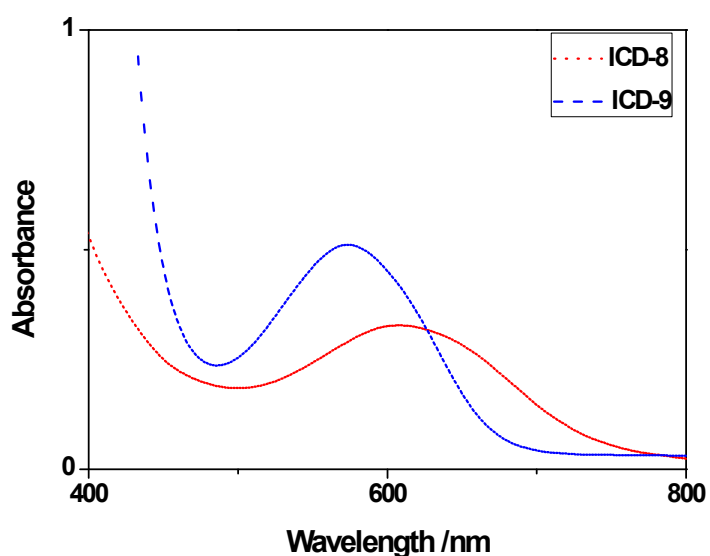

Fig.S1 The UV-Vis spectra of ICD-8 and ICD-9 on the TiO<sub>2</sub>.

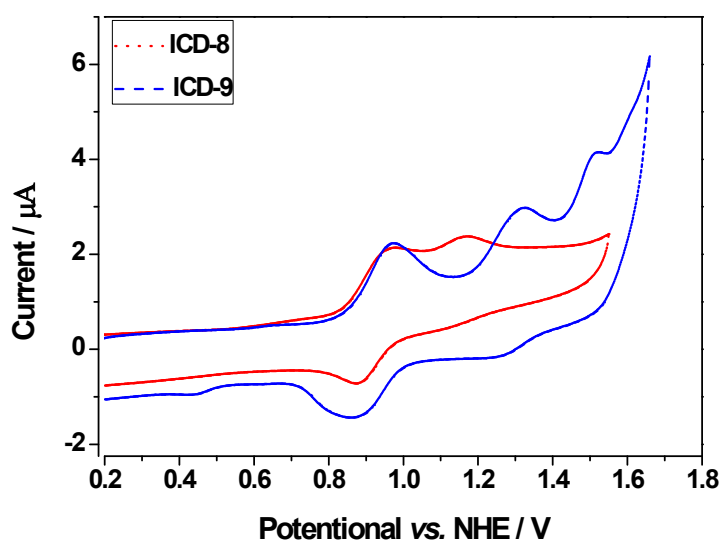

Fig.S2 The cyclic voltammograms of ICD-8 and ICD-9.
